# Supplementary material for: Ferro- and antiferromagnetic coupling in a chlorido-bridged, tetranuclear Cu(ii) complex
Source: Royal Society of Chemistry journal article supplement (doi:10.1039/c4dt00305e), 2014-01-01
Supplement: c4dt00305e1.pdf [file c4dt00305e1.pdf]

Magnetic measurements:

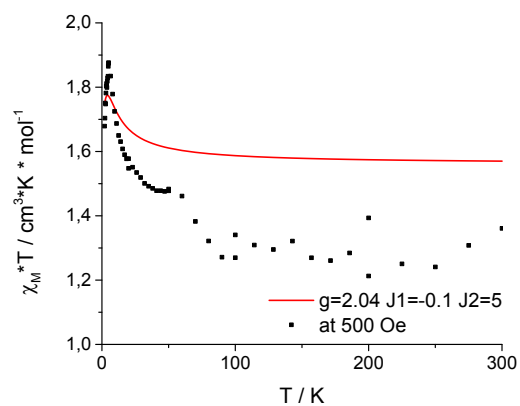

Figure 1:  $\chi T$  vs.  $T$  plot between 2 and 300 K for the tetranuclear Copper complex.

EPR:

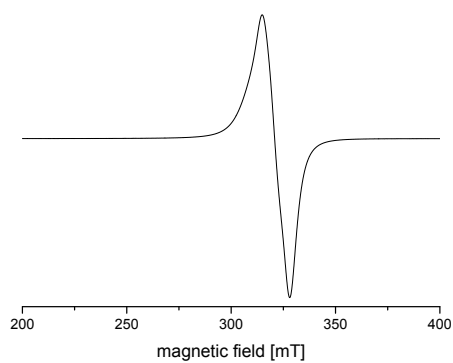

Figure 2: solid state EPR spectrum measured at 110 K.
